# Supplementary material
Source: PubMed Central journal article supplement (PMC9986817)
Supplement: EMBR-24-e55762-s004.pdf [file EMBR-24-e55762-s004.pdf]

Appendix for “METTL14 is guarded by METTL3 to evade STUB1-mediated degradation to maintain m<sup>6</sup>A homeostasis”

Zhan-Cheng Zeng<sup>1#</sup>, Qi Pan<sup>1#</sup>, Yu-Meng Sun<sup>1</sup>, Heng-Jing Huang<sup>1</sup>, Xiao-Tong Chen<sup>1</sup>, Tian-Qi Chen<sup>1</sup>, Bo He<sup>2</sup>, Hua Ye<sup>2</sup>, Shun-Xin Zhu<sup>1</sup>, Ke-Jia Pu<sup>1</sup>, Ke Fang<sup>1</sup>, Wei Huang<sup>1</sup>, Yue-Qin Chen<sup>1</sup>, Wen-Tao Wang<sup>1\*</sup>

1. MOE Key Laboratory of Gene Function and Regulation, Guangdong Province Key Laboratory of Pharmaceutical Functional Genes, State Key Laboratory for Biocontrol, School of Life Sciences, Sun Yat-sen University, Guangzhou 510275, China.

2. Department of Hepatobiliary, and Department of Anesthesiology, Sun Yat-sen Memorial Hospital, Sun Yat-sen University, Guangzhou 510120, China.

**\*Corresponding authors:** wangwt8@mail.sysu.edu.cn to Wen-Tao Wang, School of Life Sciences, Sun Yat-sen University, Guangzhou 510275, P. R. China. Phone: 86-20-84112739

## Table of contents

|                                                                                    |          |
|------------------------------------------------------------------------------------|----------|
| <b>Appendix Table S1: Clinicopathological characteristics of CCA patients.....</b> | <b>2</b> |
| <b>Appendix Table S2: Sequences of primers used in this study.....</b>             | <b>3</b> |

**Appendix Table S1. Clinicopathological characteristics of CCA patients.**

| <b>Code</b> | <b>Age (year)</b> | <b>Gender</b> | <b>Tumor size<br/>(cm)</b> | <b>Location</b> | <b>Hepatitis<br/>(HBV/HCV)</b> | <b>CA19-9 (U/ml)</b> | <b>Differentiation</b> | <b>Metastasis</b>                               |
|-------------|-------------------|---------------|----------------------------|-----------------|--------------------------------|----------------------|------------------------|-------------------------------------------------|
| <b>1</b>    | 33                | Female        | 4                          | Extra-hepatic   | HBV-;HCV-                      | 3.2                  | moderately poorly      | Peritoneal metastasis,<br>lymph node metastasis |
| <b>2</b>    | 62                | Male          | 10                         | Intra-hepatic   | HBV+;HCV-                      | 14047.5              | moderately poorly      | Lymph node metastasis                           |
| <b>3</b>    | 56                | Male          | 5                          | Intra-hepatic   | HBV+;HCV-                      | 145.9                | moderately             | Nerve fiber and duorectum<br>metastasis         |
| <b>4</b>    | 63                | Female        | 3                          | Extra-hepatic   | HBV-;HCV-                      | 2041                 | poorly                 | Lymph node metastasis                           |
| <b>5</b>    | 59                | Male          | 7                          | Intra-hepatic   | HBV+;HCV-                      | 18706                | moderately poorly      | Lymph node metastasis                           |
| <b>6</b>    | 46                | Male          | 1.2                        | Extra-hepatic   | HBV-;HCV-                      | NA                   | well                   | None                                            |
| <b>7</b>    | 66                | Male          | 5                          | Intra-hepatic   | HBV-;HCV-                      | 0                    | well                   | Lymph node metastasis                           |
| <b>8</b>    | 67                | Male          | 2.5                        | Extra-hepatic   | HBV-;HCV-                      | 606.4                | moderately poorly      | Lymph node metastasis                           |

Abbreviations: CCA, cholangiocarcinoma; NA, not available; HBV: Hepatitis B Virus; HCV: Hepatitis C Virus.

**Appendix Table S2. Sequences of primers used in this study.**

| <b>Name</b>                                                 | <b>Sequence (5'-3')</b>                                              | <b>Research purpose</b>                                                                                                                   |
|-------------------------------------------------------------|----------------------------------------------------------------------|-------------------------------------------------------------------------------------------------------------------------------------------|
| <b>Primers for PCR of determined genes and truncations.</b> |                                                                      |                                                                                                                                           |
| METTL3_FLAG_XbaI_F                                          | TCTAGAATGGATTACAAGGATGACG<br>ATGACAAGTCGGACACGTGGAGCTC<br>TATCCAGGCC | Construction of METTL3 ORF with<br>N-terminal FLAG tag                                                                                    |
| METTL3_R_NotI_R                                             | GCGGCCGCGCTATAAATTCTTAGGTT<br>TAGAGATG                               | Construction of METTL3 ORF                                                                                                                |
| METTL14_FLAG_XbaI_F                                         | TCTAGAATGGATTACAAGGATGACG<br>ATGACAAGGATAGCCGCTTGCAGGA<br>GATC       | Construction of METTL14 ORF with<br>N-terminal FLAG tag                                                                                   |
| METTL14_R_BamHI_R                                           | GGATCCCTATCGAGGTGGAAAGCCA<br>CCTCTGTG                                | Construction of METTL14 ORF or<br>METTL14 truncation 286-456aa,<br>METTL14 truncation 111-456aa,<br>METTL14 truncation $\Delta$ 111-285aa |
| METTL14_HA_XbaI_F                                           | TCTAGAATGTACCCATACGACGTCCC<br>AGACTACGCGATAGCCGCTTGCAGG<br>AGATC     | Construction of METTL14 ORF or<br>METTL14 truncation 1-110aa,<br>METTL14 truncation $\Delta$ 111-285aa,<br>METTL14 truncation 1-285aa     |
| METTL14_1_BamHI_R                                           | GGATCCTTATGTTCCCTTAAGAAAAG<br>TACTAGA                                | Construction of METTL14 truncation<br>1-110aa                                                                                             |
| METTL14_1_NTC-BamHI_R                                       | GGATCCTGTTCCCTTAAGAAAAGTAC<br>TAGA                                   | Construction of METTL14 truncation<br>1-110aa with C-terminal GFP tag                                                                     |
| METTL14_2_HA_XbaI_F                                         | TCTAGAATGTACCCATACGACGTCCC<br>AGACTACGCCAGAGCTTAAATCCCCA<br>TAATG    | Construction of METTL14 truncation<br>111-285aa, or METTL14 truncation<br>111-456aa                                                       |
| METTL14_2_BamHI_R                                           | GGATCCTTACTTTGTTCTCTGAAAGA<br>CAGCCTT                                | Construction of METTL14 truncation<br>111-285aa, METTL14 truncation 1-<br>285aa                                                           |
| METTL14_2_NTC-BamHI_R                                       | GGATCCCTTTGTTCTCTGAAAGACAG<br>CCTT                                   | Construction of METTL14 truncation<br>111-285aa with C-terminal GFP tag                                                                   |
| METTL14_3_HA_XbaI_F                                         | TCTAGAATGTACCCATACGACGTCCC<br>AGACTACGCGAACACTGCCTCATGG<br>GGATC     | Construction of METTL14 truncation<br>286-456aa with N-terminal HA tag                                                                    |
| METTL14_NTC_BamHI_R                                         | GGATCCTCGAGGTGGAAAGCCACCT<br>CTGTG                                   | Construction of METTL14 ORF with<br>C-terminal GFP tag, METTL14<br>truncation 286-456aa with C-terminal<br>GFP tag                        |
| METTL14_5_fusion-F                                          | ATTTGCCATATGAAGAAGAGAACAC<br>TGCCTCATGGGGATC                         | Construction of METTL14 truncation<br>$\Delta$ 111-285aa                                                                                  |
| METTL14_5_fusion-R                                          | GATCCCCATGAGGCAGTGTCTCTTC<br>TTCATATGGCAAAT                          | Construction of METTL14 truncation<br>$\Delta$ 111-285aa                                                                                  |

|                        |                                                        |                                                                   |
|------------------------|--------------------------------------------------------|-------------------------------------------------------------------|
| METTL14-GST-F          | TAAGGGATCCAAGCTTGATAGCCGCT<br>TGCAGGAGATCC             | Construction of METTL14 ORF with<br>N-terminal GST tag            |
| METTL14-GST-R          | TAGGGGACATAAGCTTTCGAGGTGG<br>AAAGCCACCTCTG             | Construction of METTL14 ORF with<br>N-terminal GST tag            |
| STUB1-6×His-R          | GCGAAGCTTGTAGTCCTCCACCCAGC<br>CATTC                    | Construction of STUB1 ORF with C-<br>terminal His tag             |
| METTL3_APPA_F          | GTTTGCAGTTGTGATGGCTGCACCAC<br>CCGCAGATATTCACATGGAACCTG | Construction of METTL3 APPA<br>mutant isoform                     |
| METTL3_APPA_R          | CAGTTCCATGTGAATATCTGCGGGTG<br>GTGCAGCCATCACAACCTGCAAAC | Construction of METTL3 APPA<br>mutant isoform                     |
| METTL3_ (Δ450_454aa)_F | CTAAACCTCTGGGGGTATATTATTG<br>GGTGAAGACAAAT             | Construction of METT3 truncation<br>Δ450-454aa                    |
| METTL3_ (Δ450_454aa)_R | ATTTGTCTTCACCCAAATAATATACC<br>CCCAGAGGTTTAG            | Construction of METT3 truncation<br>Δ450-454aa                    |
| METTL3_ (Δ464_480aa)_F | GGGTGAAGACAAATCAACTGGAACA<br>CTGCTTGGTTGGTGT           | Construction of METT3 truncation<br>Δ464-480aa                    |
| METTL3_ (Δ464_480aa)_R | ACACCAACCAAGCAGTGTTCAGTTG<br>ATTTGTCTTCACCC            | Construction of METT3 truncation<br>Δ464-480aa                    |
| STUB1_F                | AGCGAATTCGAAGGATCCATGAAGG<br>GCAAGGAGGAGAAGG           | Construction of STUB1 ORF or<br>STUB1 ORF with C-terminal His tag |
| STUB1_R                | ATGATCTTTGTAATCGGATCCGTAGT<br>CCTCCACCCAGCCATTC        | Construction of STUB1 ORF                                         |
| STUB1_ΔU-box_R         | ATGATCTTTGTAATCGGATCCGGCCC<br>GGACGTGGCTGTCGTCCTCA     | Construction of STUB1 truncation 1-<br>195aa                      |
| STUB1_ΔTPR_F           | AGCGAATTCGAAGGATCCATGAAGA<br>AGAAGCGCTGGAACAGCATTG     | Construction of STUB1 truncation<br>143-312aa                     |
| STUB1-H260Q-F          | CGAGGAGCAACTGCAGCGTGTGGGT<br>CATTTTGAC                 | Construction of STUB1 <sup>H260Q</sup> mutant                     |
| STUB1-H260Q-R          | ACGCTGCAGTTGCTCCTCGATGTCCT<br>TGCGGTCGTA               | Construction of STUB1 <sup>H260Q</sup> mutant                     |

**Primers for transcription quantitative polymerase chain reaction(RT-qPCR).**

|             |                          |
|-------------|--------------------------|
| q-METTL3-F  | TTGTCTCCAACCTTCCGTAGTG   |
| q-METTL3-R  | CCAGATCAGAGAGGTGGTGTAG   |
| q-METTL14-F | AGAAACTTGCAGGGCTTCCTAT   |
| q-METTL14-R | TCTTCTTCATATGGCAAATTTTCT |
| q-WTAP-F    | CCTCTTCCCAAGAAGGTTTCGATT |
| q-WTAP-R    | TGCAGACTCCTGCTGTTGTTG    |
| q-ACTIN-F   | TTGTTACAGGAAGTCCCTTGCC   |

---

|            |                         |
|------------|-------------------------|
| q-ACTIN-R  | ATGCTATCACCTCCCCTGTGTG  |
| q-STUB1-F  | AGGCCAAGCACGACAAGTACAT  |
| q-STUB1-R  | CTGATCTTGCCACACAGGTAGT  |
| q-TRIM33-F | CCAATTCACTTTCTAGATGCAGG |
| q-TRIM33-R | GGAGTGCTTGCATGTTGAG     |
| q-UBR5-F   | GAAGAGGTTGAGGTGGTGGGA   |
| q-UBR5-R   | CAGCTCCATATCACTCCCGT    |
| q-UBR1-F   | AGTAGACACAGGCCTACCCC    |
| q-UBR1-R   | ACCCACAAATACCAGCCAGG    |

**siRNA for target gene transient knockdown**

|            |                           |
|------------|---------------------------|
| siMETTL3-1 | CUGCAAGUAUGUUCACUAUGA     |
| siMETTL3-2 | AGGAGCCAGCCAAGAAAUCA      |
| siSTUB1-1  | GGCAAUCGUCUGUUCGUGGGCCGAA |
| siSTUB1-2  | CCAGCGCUCUUCGAAUCGCGAAGAA |
| siUBR1-1   | AAGCAGGAGGAAAGUGUACAA     |
| siUBR1-2   | AUGGAAAUCAGCGCGGAGUUA     |
| siUBR5-1   | GCGACUCUCCAUGGUUUCU       |
| siUBR5-2   | GCGACUCUCCAUGGUUUCU       |
| siTRIM33-1 | CCUGCAUCUAGAAAGUGAA       |
| siTRIM33-2 | GCGACUGAUUACUUCCA         |

**shRNA for target gene stable knockdown.**

|              |                                                                         |
|--------------|-------------------------------------------------------------------------|
| shMETTL3-1-F | GATCCCTGCAAGTATGTTCACTATGACTTCCTGTCAGATCATAGTGAACATA<br>CTTGACAG TTTTTG |
| shMETTL3-1-R | AATTCAAAAACACTGCAAGTATGTTCACTATGATCTGACAGGAAGTCATAGTG<br>AACATACTTGCAGG |
| shMETTL3-2-F | GATCCAGGAGCCAGCCAAGAAATCAACTTCCTGTCAGATTGATTTCTTGGCT<br>GGCTCCTTTTTTG   |

---

|              |                                                                            |
|--------------|----------------------------------------------------------------------------|
| shMETTL3-2-R | AATTCAAAAAAGGAGCCAGCCAAGAAATCAATCTGACAGGAAGTTGATTTCTTGGCTGGCTCCTG          |
| shSTUB1-1-F  | GATCCGGCAATCGTCTGTTTCGTGGGCCGAACCTCCTGTCAGATTCGGCCACGAACAGACGATTGCCTTTTTG  |
| shSTUB1-1-R  | AATTCAAAAAAGGCAATCGTCTGTTTCGTGGGCCGAATCTGACAGGAAGTTCCGCCACGAACAGACGATTGCCG |
| shSTUB1-2-F  | GATCCCAGCGCTCTTCGAATCGCGAAGAACTCCTGTCAGATTCTTCGCGATTTCGAAGAGCGCTGGTTTTG    |
| shSTUB1-2-R  | AATTCAAAAACCAGCGCTCTTCGAATCGCGAAGAATCTGACAGGAAGTTCTTCGCGATTTCGAAGAGCGCTGGG |
| shUBR1-1-F   | GATCCAAGCAGGAGGAAAGTGTACAACCTCCTGTCAGATTGTACACTTTCTCCTGCTTTTTTTG           |
| shUBR1-1-R   | AATTCAAAAAAGCAGGAGGAAAGTGTACAATCTGACAGGAAGTTGTACACTTTCTCCTGCTT             |
| shUBR1-2-F   | GATCCATGGAATCAGCGCGGAGTTACTTCTGTCAGATAACTCCGCGCTGATTTCCATTTTTT             |
| shUBR1-2-R   | AATTCAAAAAATGGAATCAGCGCGGAGTTATCTGACAGGAAGTAACTCCGCGCTGATTTCCATG           |
| shUBR5-1-F   | GATCCGCGACTCTCCATGGTTTCTTCTCCTGTCAGAAGAAACCATGGAGAGTCGCTTTTTG              |
| shUBR5-1-R   | AATTCAAAAAGCGACTCTCCATGGTTTCTTCTGACAGGAAGAGAAACCATGGAGAGTCGCG              |
| shUBR5-2-F   | GATCCCAACTTAGATCTCCTGAAACTTCTGTCAGATTTTCAGGAGATCTAAGTTGTTTTG               |
| shUBR5-2-R   | AATTCAAAAACAACCTTAGATCTCCTGAAATCTGACAGGAAGTTTCAGGAGATCTAAGTTG              |
| shTRIM33-1-F | GATCCCCTGCATCTAGAAAGTGAACCTCCTGTCAGATTTCTAGATGCAGGTTTTG                    |
| shTRIM33-1-R | AATTCAAAAACCTGCATCTAGAAAGTGAACCTCTGACAGGAAGTTCACTTTCTAGATGCAGG             |
| shTRIM33-2-F | GATCCGCGACTGATTACTTTCCACTTCTGTCAGATGGAAAGTAATCAGTCGCTTTTTG                 |
| shTRIM33-2-R | AATTCAAAAAGCGACTGATTACTTTCCATCTGACAGGAAGTGGAAAGTAATCAGTCGCG                |

---
