# Supplementary material
Source: PubMed Central journal article supplement (PMC9986817)
Supplement: EMBR-24-e55762-s009.pdf [file EMBR-24-e55762-s009.pdf]

## Expanded View Figures

### Figure EV1. METTL3 but not WTAP protects METTL14 protein.

- A RT-qPCR analysis of the expression levels of *METTL3* and *METTL14* in siRNA knockdown *METTL3* cells. Data are mean  $\pm$  SEM of three biological replicates and were analyzed by two-tailed unpaired *t*-test. \*\*\**P* < 0.001; n.s., not significant.
- B Immunoblots showing total METTL3 protein levels in FLAG-tagged *METTL3*-overexpressing cells.  $\beta$ -actin was used as the loading control. The total METTL3/ $\beta$ -actin densitometric ratio was recorded by ImageJ.
- C Immunoblots showing METTL14 and WTAP protein levels in *WTAP* knockdown cells.  $\beta$ -actin was used as the loading control. The METTL14 or WTAP/ $\beta$ -actin densitometric ratio was recorded by ImageJ.
- D Immunoblots showing METTL14 protein levels in FLAG-tagged *METTL3* or HA-tagged *WTAP*-overexpressing cells.  $\beta$ -actin was used as the loading control. The METTL14/ $\beta$ -actin densitometric ratio was recorded by ImageJ.

Source data are available online for this figure.

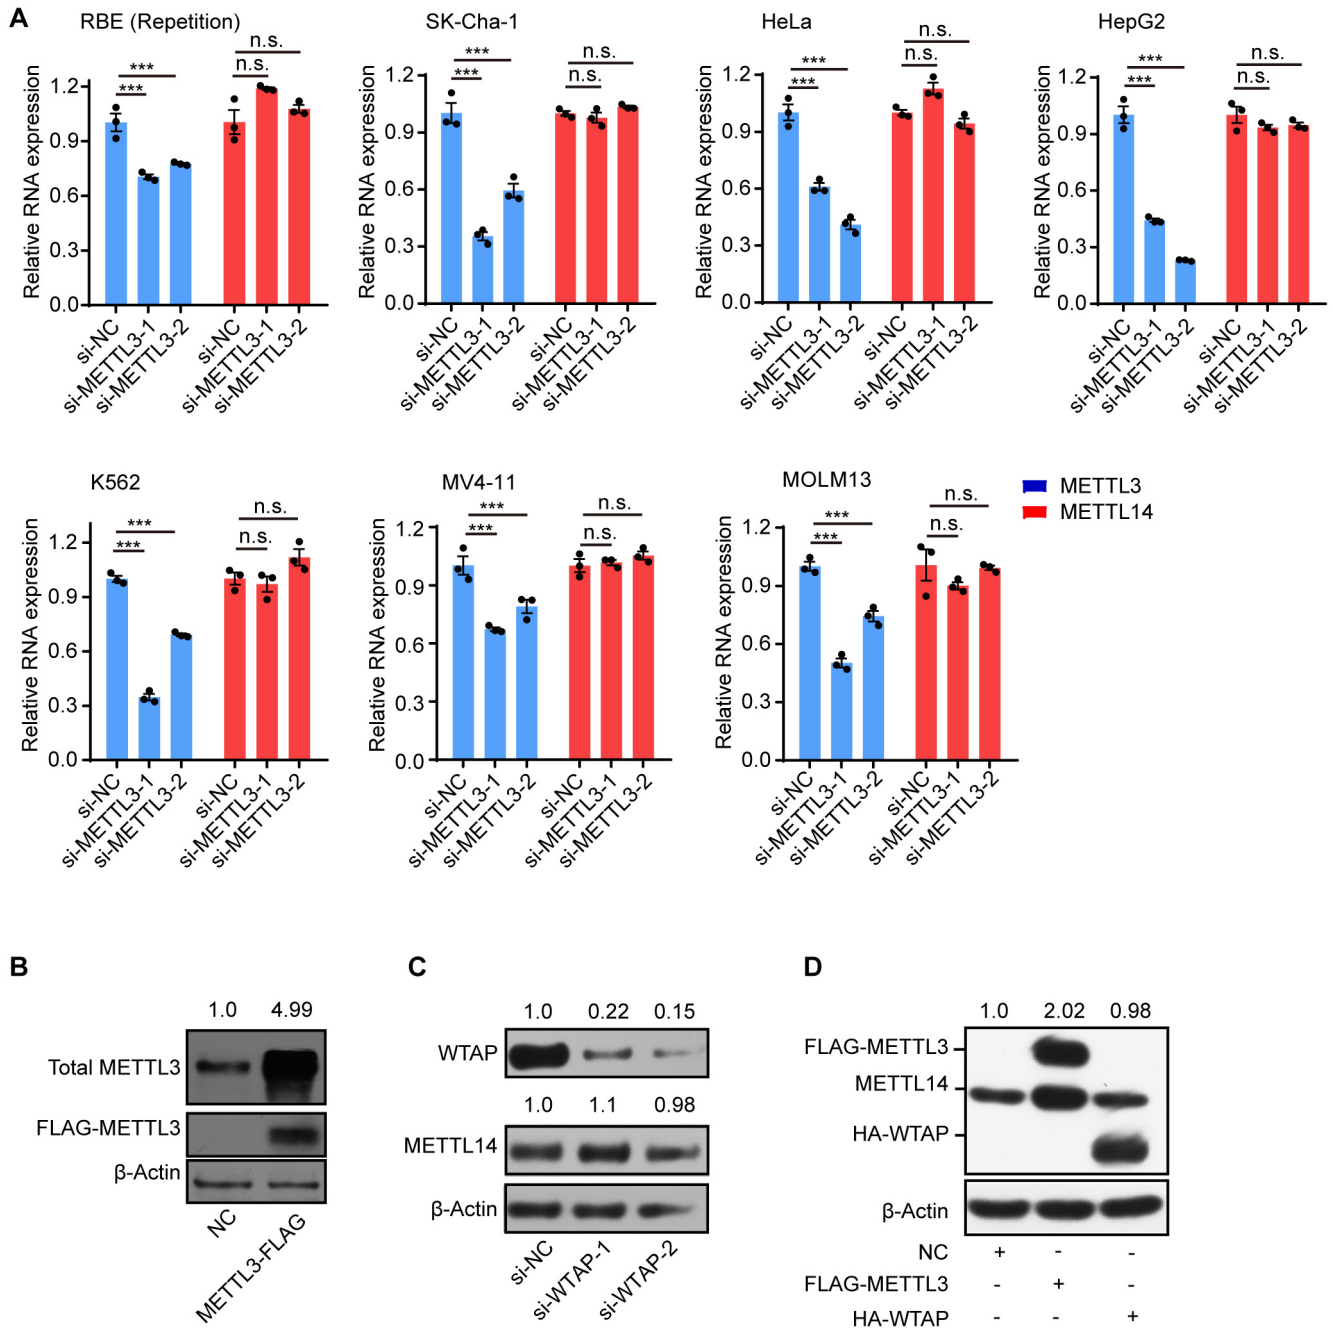

Figure EV1.

**Figure EV2. STUB1 interacts with METTL14 but is dispensable for regulating METTL14 mRNA levels.**

- A List of the "Proteasome" category in the METTL14 interactome identified by MS, including five PSMA, one PSMB, four PSMC, and eight PSDM.
- B Immunoblots showing PSMD3-myc protein levels in myc-tagged *PSMD3*-overexpressing cells.  $\beta$ -actin was used as the loading control.
- C RT-qPCR analysis of the efficiency of shRNA-knockdown for *STUB1*, *UBR1*, *UBR5*, and *TRIM33*.  $\beta$ -actin was used as the reference. Data are mean  $\pm$  SEM of three biological replicates and were analyzed by two-tailed unpaired *t*-test. (n.s., not significant; \*\*\**P* < 0.001).
- D, E Co-IP of METTL14 and STUB1 in HEK293T and SK-Cha-1 cells.
- F RT-qPCR analysis of expression levels of *STUB1* and *METTL14* in *STUB1* knockdown cells. Data are mean  $\pm$  SEM of three biological replicates and were analyzed by two-tailed unpaired *t*-test. \*\*\**P* < 0.001; n.s., not significant.

Source data are available online for this figure.

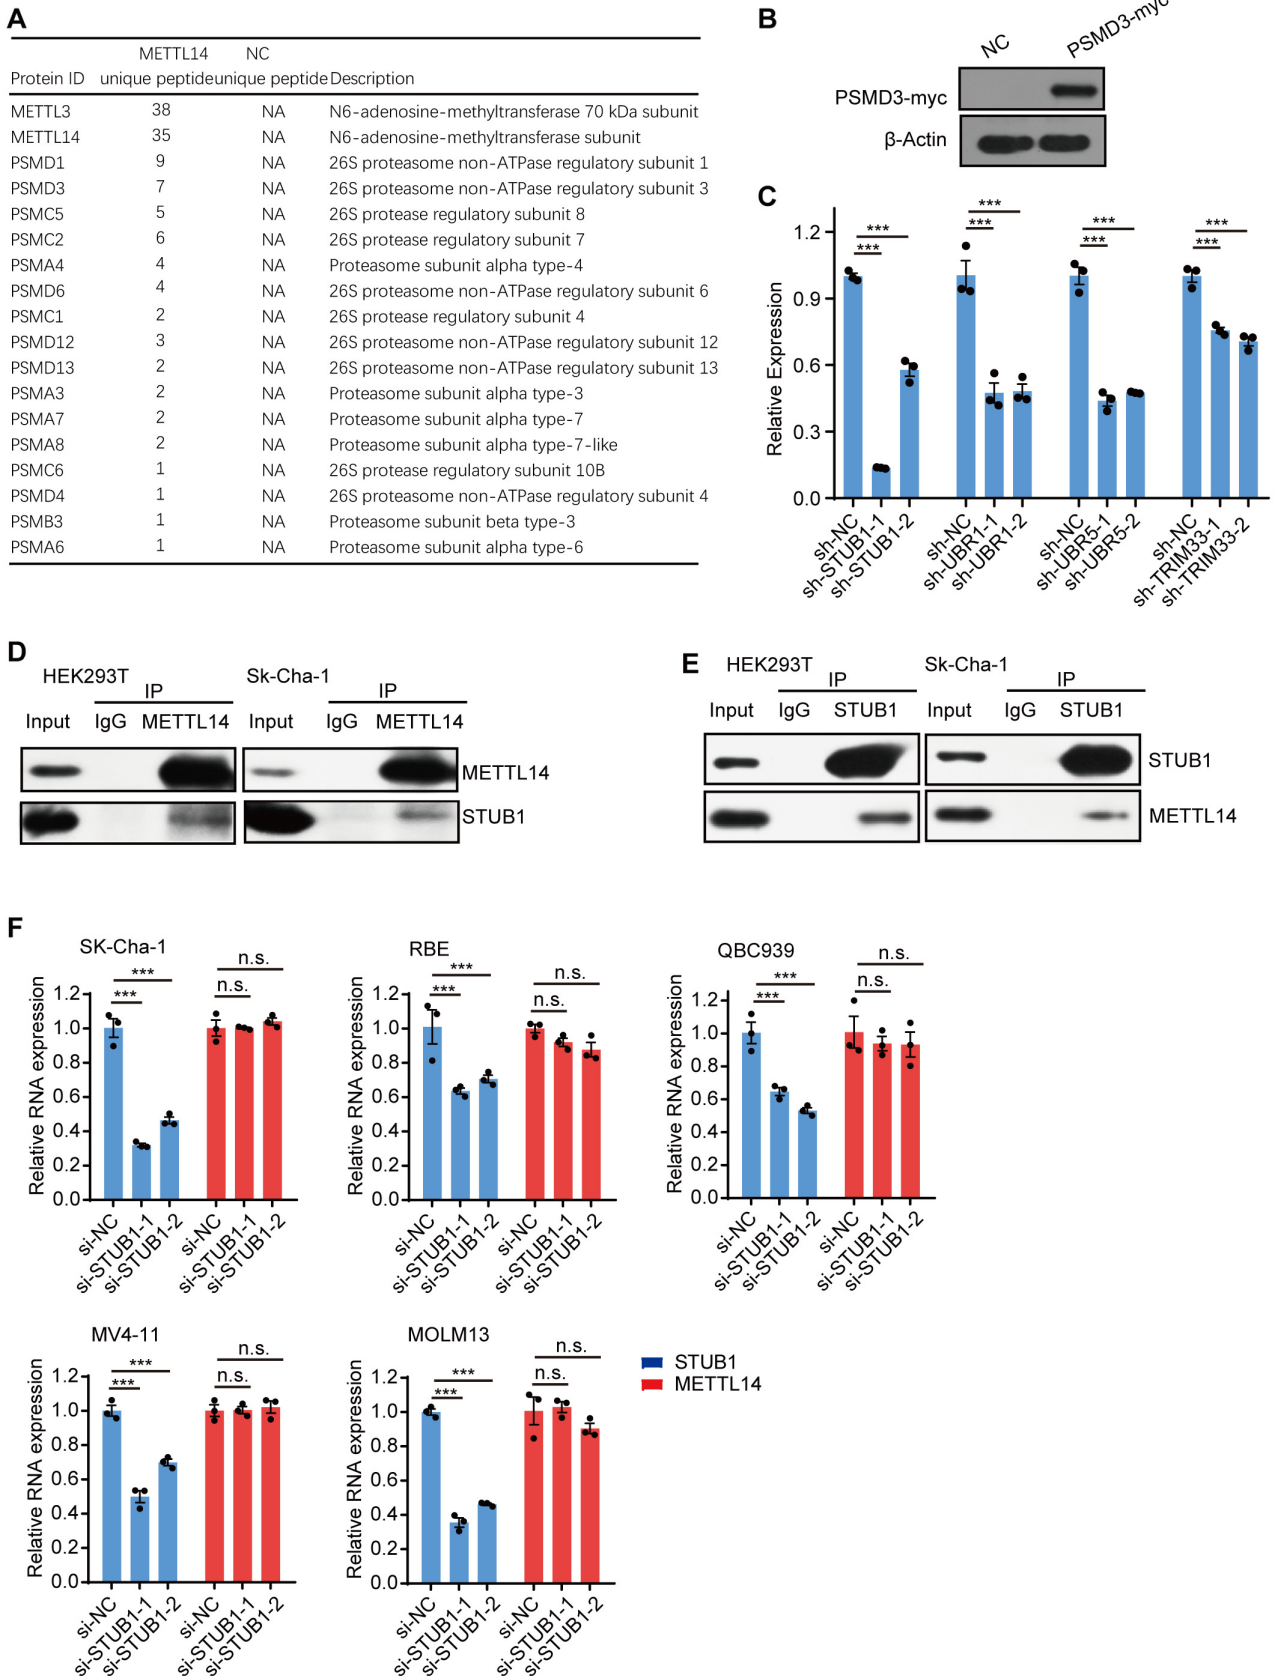

Figure EV2.

**Figure EV3. Possible ubiquitination sites in METTL14.**

- A Schematic diagram of METTL14-domain-deletion mutants. All mutants were GFP-tagged.
- B Co-IP of GFP-tagged METTL14-domain-deletion mutant with FLAG-tagged STUB1.
- C Immunoblots showing purified GST-STUB1-His, STUB1-His, GST-METTL14, and METTL14.
- D Dot blot assays showing the role of sh-*STUB1* in regulating m<sup>6</sup>A levels.
- E Schematic diagram of the lysine sites located at aa 111–285 of METTL14.
- F METTL14 ubiquitination, as detected by IP of a series of lysine (K)-to-arginine (R) mutations in aa 111–285. The accumulation of Ub and METTL14 was confirmed in whole-cell lysates. WT, wild type.

Source data are available online for this figure.

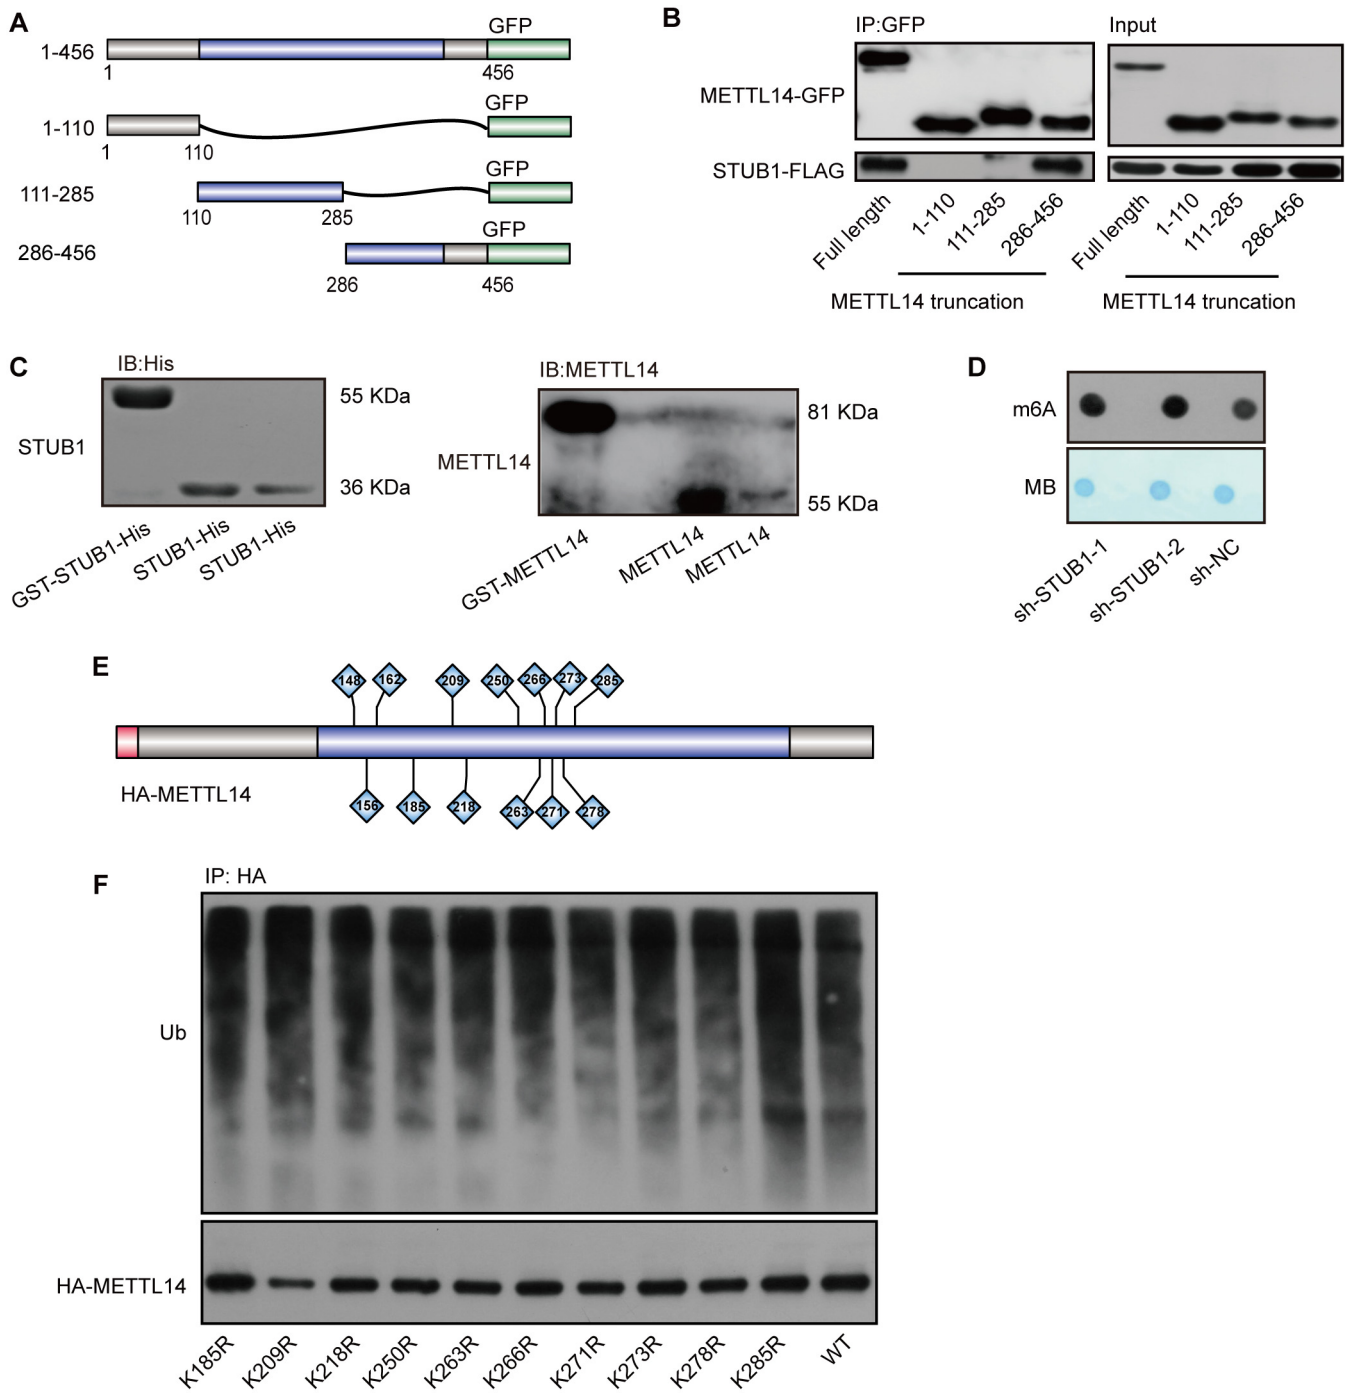

Figure EV3.

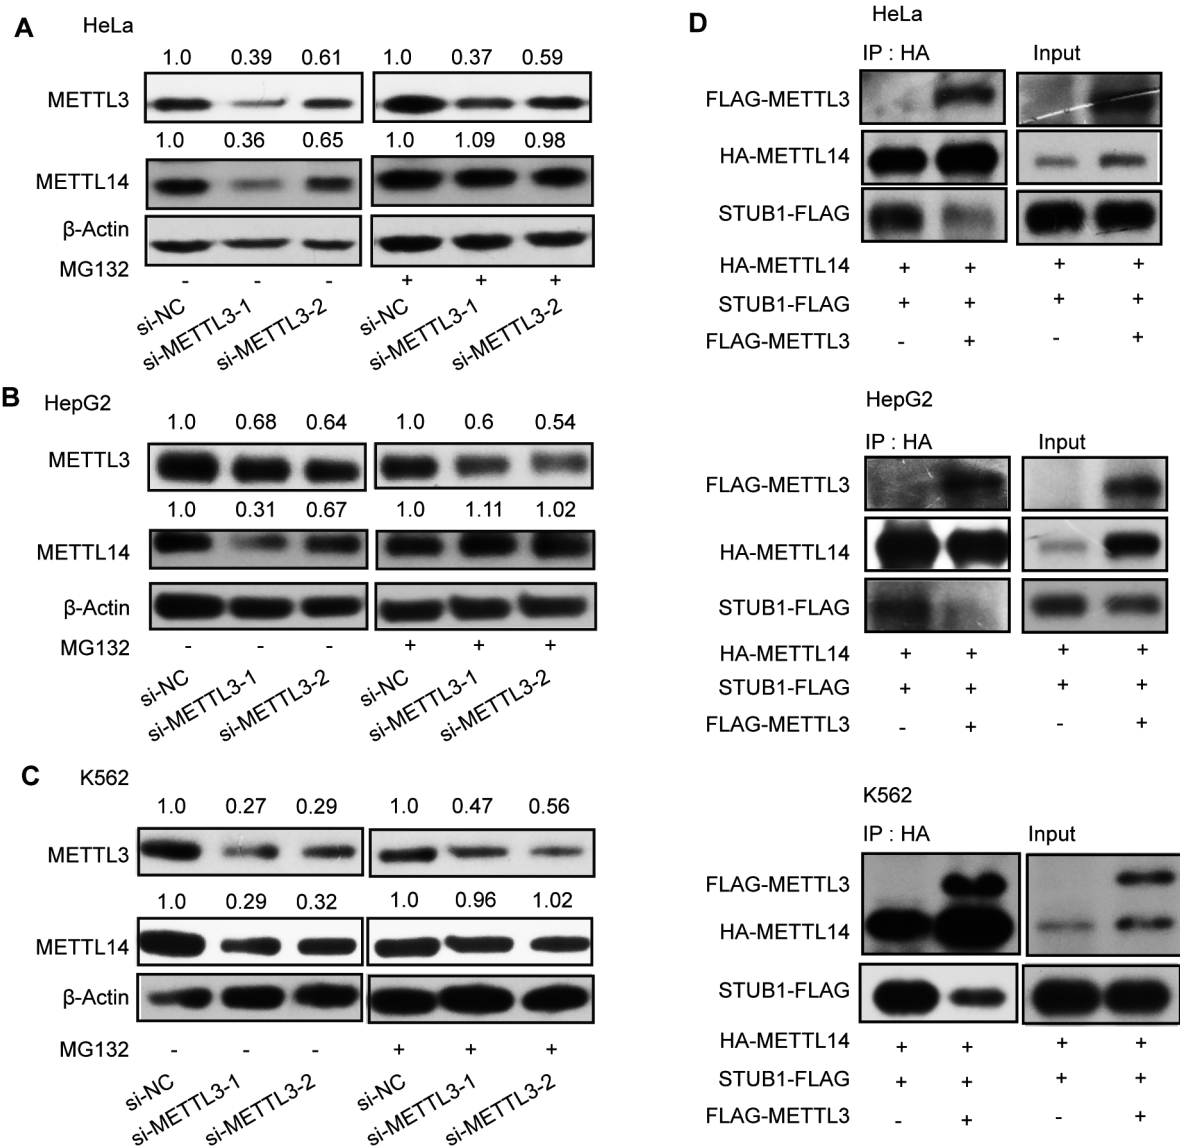

**Figure EV4. METTL3 protects METTL14 from STUB1-mediated ubiquitination.**

A–C Immunoblots showing METTL14 protein levels under *METTL3* knockdown with or without 10  $\mu$ M MG132 treatment in HeLa (A), HepG2 (B), and K562 (C) cells.  $\beta$ -actin was used as the loading control. The METTL3 or METTL14/ $\beta$ -actin densitometric ratio was recorded by ImageJ.

D Immunoblots showing the interaction between METTL14 and STUB1 detected by IP with or without FLAG-METTL3 in HeLa, HepG2, and K562 cells.

Source data are available online for this figure.

**Figure EV5. STUB1-mediated degradation of METTL14 can suppress CCA progression and has potential clinical relevance.**

- A Morphology of colonies of Sk-Cha-1 cells upon shRNA-mediated *STUB1* knockdown. Data are mean  $\pm$  SEM of three biological replicates and were analyzed by two-tailed unpaired t-test. (\*\* $P < 0.01$ ).
- B CCK-8 assays showing cell viability after shRNA-mediated *STUB1* knockdown. Data are mean  $\pm$  SEM of three biological replicates and were analyzed by two-way ANOVA. (\*\* $P < 0.01$ ).
- C Immunoblots showing METTL14 protein levels in CCA cells overexpressing *STUB1-FLAG*.  $\beta$ -actin was used as the loading control. The METTL14 / $\beta$ -actin densitometric ratio was recorded by ImageJ.
- D CCK-8 assays showing cell viability in MZ-Cha-1 cells overexpressing *STUB1*. Data are mean  $\pm$  SEM of three biological replicates and were analyzed by two-way ANOVA (\*\* $P < 0.001$ ).
- E Immunoblots showing METTL14 protein levels under *STUB1* knockdown and *METTL14* knockdown (left panel) in RBE cells.  $\beta$ -actin was used as the loading control. The METTL14 or *STUB1*/ $\beta$ -actin densitometric ratio was recorded by ImageJ. CCK-8 assays showing cell viability upon the function of METTL14 in *STUB1* knockdown cells (right panel). Data are mean  $\pm$  SEM of three biological replicates and were analyzed by two-way ANOVA (\*\* $P < 0.001$ ).
- F–H Following the subcutaneous inoculation of SK-Cha-1-sh-NC (left) and SK-Cha-1-sh-*STUB1-2* (right) cells into the flanks of male nude mice (F), *STUB1* knockdown promoted the proliferation of malignant cells (G) and increased subsequent tumor size and growth (H). Data are mean  $\pm$  SEM. Statistical significance was analyzed by two-way ANOVA (G) and two-tailed unpaired t-test (H) (Six mice, \* $P < 0.05$ ; \*\* $P < 0.01$ ).
- I Pan-cancer analysis using TCGA data sets consisting of 1,210 patient samples showing that *METTL14* and *STUB1* expression is negatively correlated (Pearson's correlation coefficient  $-0.3443$ ,  $P < 0.001$ ).
- J Immunoblot analysis showing METTL3 and METTL14 protein levels in eight pairs of CCA patient samples. N, adjacent non-tumor tissue; T, tumor tissue. GAPDH was used as the loading control. The METTL3 or METTL14 /GAPDH densitometric ratio was recorded by ImageJ.
- K–M *STUB1* protein levels are low in patient samples with high carcinoembryonic antigen and total bilirubin, and intrahepatic metastasis in the Fudan University intrahepatic cholangiocarcinoma (FU-iCCA) cohort (using patient samples from the 5–95% bin according to *STUB1* protein levels; a two-tailed unpaired t-test was used). In the boxplot, the central band indicates the median, the box indicates the interquartile range, and the whiskers indicate the 5–95% percentile.

Source data are available online for this figure.

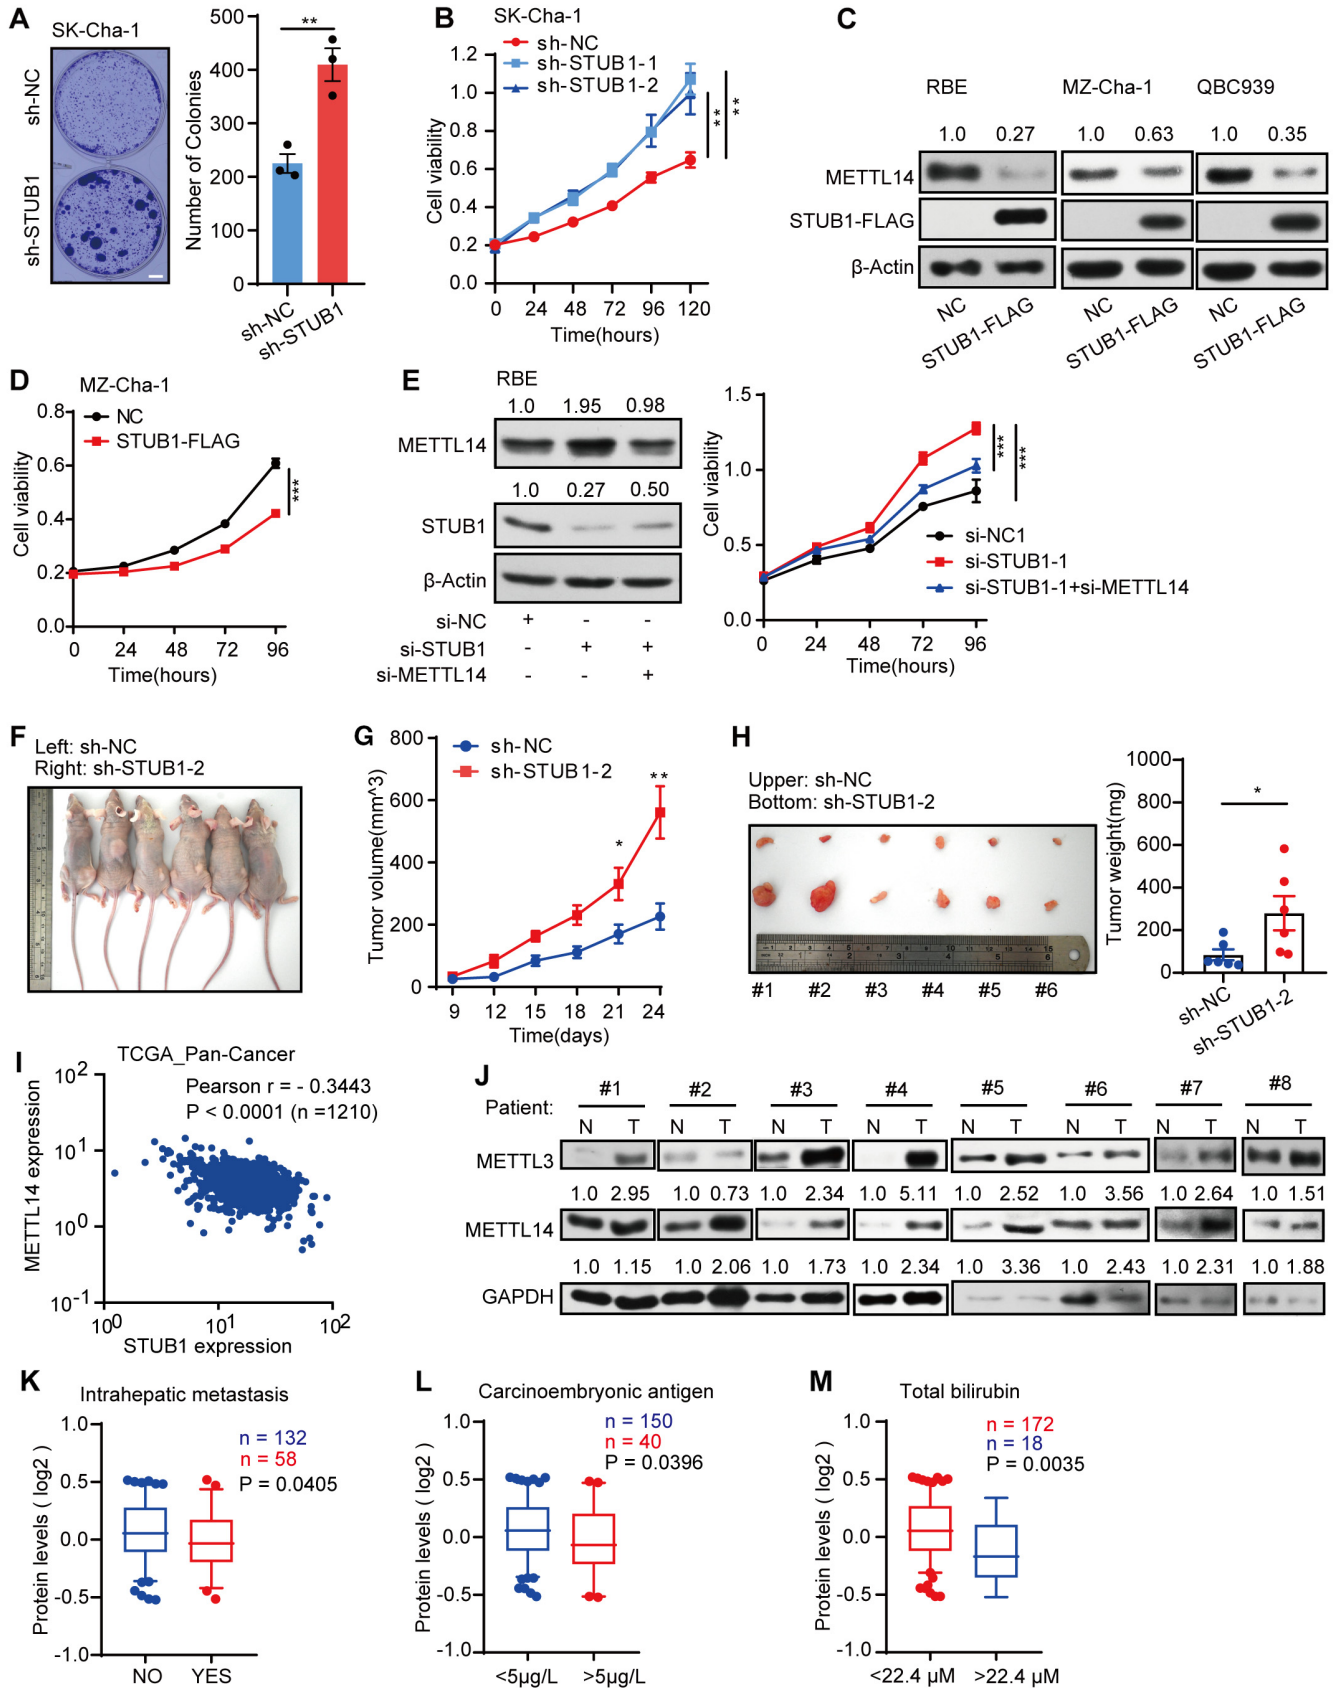

Figure EV5.
